# Supplementary material for: Prospective Multicenter Validation of Machine Learning Models for Mortality Prediction in Adult Critically Ill Patients using Transfer Learning
Source: Research Square preprint supplement (doi:10.21203/rs.3.rs-8872055/v1), 2026-02-19
Supplement: Supplementary file 1 [file b1afec806a418aecd8dce933.docx]

Supplementary Material

**Table S1**: Performance comparison of all ML models on the prospective set.

| **Model** | **Brier Score** | **Sensitivity** | **Specificity** |
| --- | --- | --- | --- |
| RF | 0.167 | 0.824 | 0.850 |
| ITL | 0.115 | 0.862 | 0.827 |
| DA | 0.136 | 0.852 | 0.842 |
| XGBoost | 0.132 | 0.819 | 0.788 |
| ITL | 0.110 | 0.829 | 0.845 |
| DA | 0.117 | 0.805 | 0.830 |
| LightGBM | 0.131 | 0.829 | 0.827 |
| ITL | 0.114 | 0.829 | 0.832 |
| DA | 0.119 | 0.871 | 0.808 |
| CatBoost | 0.120 | 0.752 | **0.865** |
| ITL | **0.106** | 0.805 | 0.815 |
| DA | 0.117 | 0.838 | 0.775 |
| NODE | 0.157 | 0.810 | 0.827 |
| ITL | 0.112 | 0.852 | 0.813 |
| DA | 0.139 | 0.862 | 0.792 |
| SAINT | 0.163 | **0.871** | 0.810 |
| ITL | 0.117 | 0.838 | 0.812 |
| DA | 0.132 | 0.852 | 0.832 |

Values represent mean estimates with 95% confidence intervals. Sensitivity and Specificity are reported where the Youden’s J statistic is maximized. Best results are shown in bold. *Abbreviations: CatBoost = Categorical Boosting; LightGBM = Light Gradient-Boosting Machine; NODE = Neural Oblivious Decision Ensembles; RF = Random Forest; SAINT = Self-Attention and INtersample attention Transformer; XGBoost = Extreme Gradient Boosting.*

**Table S2**: Descriptive statistics of all MIMIC-IV study variables.

| **Variable** | **Min** | **Max** | **Mean** | **Missing (%)** |
| --- | --- | --- | --- | --- |
| Age | 18.00 | 103.00 | 64.79 | 0.00 |
| Sex (1=M, 0=F) | 0.00 | 1.00 | 0.56 | 0.00 |
| Smoking (1=yes, 0=no) | 0.00 | 1.00 | 0.26 | 0.00 |
| Transfer from another ICU (1=yes, 0=no) | 0.00 | 1.00 | 0.10 | 0.00 |
| Steroids prior to ICU admission (1=yes, 0=no) | 0.00 | 1.00 | 0.09 | 0.00 |
| Mechanical ventilation on admission (1=yes, 0=no) | 0.00 | 1.00 | 0.39 | 0.00 |
| Charlson Comorbidity Index (CCI) | 0.00 | 16.00 | 1.15 | 0.00 |
| GCS | 3.00 | 15.00 | 10.63 | 0.86 |
| SOFA score | 0.00 | 22.00 | 5.65 | 0.03 |
| APACHE II | 0.00 | 49.00 | 16.64 | 0.00 |
| Temperature (*◦*C) | 25.10 | 42.50 | 36.70 | 1.20 |
| Heart rate (beats per minute) | 0.00 | 295.00 | 95.99 | 0.10 |
| Systolic BP (mmHg) | 20.00 | 218.00 | 92.37 | 0.24 |
| Diastolic BP (mmHg) | 0.00 | 190.00 | 47.41 | 0.24 |
| Mean arterial pressure (mmHg) | 30.00 | 146.00 | 62.75 | 1.17 |
| Respiratory rate (breaths per minute) | 0.00 | 80.00 | 27.88 | 0.32 |
| Oxygen saturation (%) | 0.00 | 100.00 | 91.37 | 0.26 |
| FiO2 (%) | 21.00 | 100.00 | 74.72 | 53.90 |
| PaO2(mmHg) | 0.00 | 587.00 | 85.32 | 46.03 |
| PCO2 (mmHg) | 12.00 | 246.00 | 47.33 | 46.04 |
| pH | 0.94 | 7.69 | 7.32 | 44.05 |
| HCO3 (mmol/L) | 2.00 | 50.00 | 22.37 | 3.18 |
| Base excess (mmol/L) | -413.00 | 44.00 | -2.82 | 46.03 |
| WBC count (*×*103/μL) | 0.10 | 572.50 | 13.16 | 3.76 |
| Neutrophils (#) (*×*103/μL) | 0.00 | 189.34 | 10.85 | 81.16 |
| Lymphocytes (#) (*×*103/μL) | 0.00 | 5616.00 | 16.38 | 81.04 |
| Hematocrit (%) | 0.00 | 65.60 | 30.63 | 3.45 |
| Platelets count (*×*103/μL) | 5.00 | 2001.00 | 197.43 | 3.75 |
| PT (sec) | 8.00 | 150.00 | 17.03 | 19.04 |
| APTT (sec) | 15.90 | 150.00 | 42.37 | 19.79 |
| INR | 0.60 | 27.40 | 1.56 | 19.05 |
| Fibrinogen (mg/dL) | 24.00 | 1466.00 | 275.03 | 79.13 |
| BUN (mg/dL) | 1.00 | 263.00 | 27.47 | 3.21 |
| Creatinine (mg/dL) | 0.00 | 80.00 | 1.53 | 3.17 |
| Glucose (mg/dL) | 10.00 | 1276103.00 | 177.46 | 3.10 |
| Lactate (mmol/L) | 0.00 | 1276103.00 | 28.03 | 46.36 |
| AST (U/L) | 0.00 | 42606.00 | 265.38 | 55.85 |
| ALT (U/L) | 0.00 | 61854.00 | 161.82 | 56.27 |
| Total bilirubin (mg/dL) | 0.00 | 78.00 | 1.96 | 56.51 |
| Albumin (g/dL) | 0.30 | 6.80 | 3.08 | 72.81 |
| LDH (U/L) | 31.00 | 63325.00 | 564.34 | 72.52 |
| Sodium (mEq/L) | 1.36 | 177.00 | 136.83 | 3.01 |
| Potassium (mEq/L) | 1.60 | 303.00 | 4.49 | 2.95 |
| Magnesium (mEq/L) | 0.00 | 9.20 | 1.94 | 6.16 |

*Measurements were within the first 24 hours of ICU admission. Abbreviations: APTT (sec) = Activated Partial Thromboplastin Time; ALT = Alanine Aminotransferase; AST = Aspartate Aminotransferase; BP = Blood Pressure; BUN* = Blood Urea Nitrogen; FiO2 = Fraction of Inspired Oxygen; GCS = Glasgow Coma Scale; HCO3 = Bicarbonate; LDH = Lactate Dehydrogenase; PaO2 = Partial Pressure of Oxygen; PCO2 = Partial Pressure of Carbon Dioxide; PT (sec) = Prothrombin Time; pH = Potential of Hydrogen. # represents the absolute number.

**Table S3**: Descriptive statistics of clinical and laboratory variables at ICU admission for the prospective cohort.

| **Variable** | **Min** | **Max** | **Mean** | **Missing (%)** |
| --- | --- | --- | --- | --- |
| Age | 19.00 | 95.00 | 60.85 | 0.00 |
| Sex (1=M, 0=F) | 0.00 | 1.00 | 0.63 | 0.00 |
| Smoking (1=yes, 0=no) | 0.00 | 1.00 | 0.40 | 0.01 |
| Transfer from another ICU (1=yes, 0=no) | 0.00 | 0.00 | 0.00 | 0.01 |
| Steroids prior to ICU admission (1=yes, 0=no) | 0.00 | 1.00 | 0.23 | 0.00 |
| Mechanical ventilation on admission (1=yes, 0=no) | 0.00 | 1.00 | 0.58 | 0.00 |
| Charlson Comorbidity Index (CCI) | 0.00 | 12.00 | 3.87 | 0.00 |
| GCS | 3.00 | 15.00 | 12.01 | 0.00 |
| SOFA score | 0.00 | 19.00 | 6.13 | 0.01 |
| APACHE II | 0.00 | 45.00 | 13.95 | 0.01 |
| Temperature (*◦*C) | 30.00 | 40.00 | 36.58 | 0.00 |
| Heart rate (beats per minute) | 20.00 | 220.00 | 89.34 | 0.00 |
| Systolic BP (mmHg) | 60.00 | 190.00 | 118.30 | 0.00 |
| Diastolic BP (mmHg) | 30.00 | 110.00 | 63.58 | 0.00 |
| Mean arterial pressure (mmHg) | 40.00 | 133.00 | 78.77 | 0.00 |
| Respiratory rate (breaths per minute) | 11.00 | 35.00 | 20.26 | 0.00 |
| Oxygen saturation (%) | 79.00 | 100.00 | 97.97 | 0.00 |
| FiO2 (%) | 0.21 | 1.00 | 0.56 | 0.00 |
| PaO2 (mmHg) | 42.00 | 500.00 | 128.37 | 0.00 |
| PCO2 (mmHg) | 18.90 | 77.00 | 38.14 | 0.00 |
| pH | 7.11 | 7.57 | 7.37 | 0.00 |
| HCO3 (mmol/L) | 9.00 | 38.50 | 22.64 | 0.00 |
| Base excess (mmol/L) | -19.00 | 12.10 | -2.08 | 0.18 |
| WBC count (*×*103/μL) | 0.02 | 219.40 | 14.68 | 0.00 |
| Neutrophils (#) (*×*103/μL) | 0.00 | 137.83 | 12.04 | 0.01 |
| Lymphocytes (#) (*×*103/μL) | 0.00 | 191.98 | 1.50 | 0.01 |
| Hematocrit (%) | 6.20 | 50.10 | 31.41 | 0.00 |
| Platelets count(*×*103/μL) | 0.21 | 723.000 | 216.08 | 0.01 |
| PT (sec) | 9.10 | 52.00 | 15.05 | 0.03 |
| APTT (sec) | 13.20 | 394.00 | 37.41 | 0.00 |
| INR | 0.80 | 10.00 | 1.31 | 0.00 |
| Fibrinogen (mg/dL) | 2.00 | 1000.00 | 411.07 | 0.01 |
| BUN (mg/dL) | 0.00 | 123.20 | 23.65 | 0.00 |
| Creatinine (mg/dL) | 0.20 | 11.70 | 1.18 | 0.01 |
| Glucose (mg/dL) | 7.20 | 393.00 | 145.24 | 0.00 |
| Lactate (mmol/L) | 0.10 | 26.00 | 2.13 | 0.00 |
| AST (U/L) | 4.00 | 10466.00 | 177.00 | 0.01 |
| ALT (U/L) | 2.00 | 8252.00 | 139.41 | 0.00 |
| Total bilirubin (mg/dL) | 0.13 | 22.00 | 1.06 | 0.00 |
| Albumin (g/dL) | 1.30 | 4.70 | 2.95 | 0.01 |
| LDH (U/L) | 45.00 | 37140.00 | 546.56 | 0.01 |
| Sodium (mEq/L) | 119.00 | 173.00 | 140.76 | 0.00 |
| Potassium (mEq/L) | 1.30 | 7.00 | 4.32 | 0.00 |
| Magnesium (mEq/L) | 0.60 | 4.06 | 2.27 | 0.00 |

Measurements were made within the first 24 hours of ICU admission. *Abbreviations: APTT (sec) = Activated Partial Thromboplastin Time; ALT = Alanine Aminotransferase; AST = Aspartate Aminotransferase; BP = Blood Pressure; BUN = Blood Urea Nitrogen; FiO*2 *= Fraction of Inspired Oxygen; GCS = Glasgow Coma Scale; HCO*3 *= Bicarbonate; LDH = Lactate Dehydrogenase; PaO2 = Partial Pressure of Oxygen; PCO2 = Partial Pressure of Carbon Dioxide; PT (sec) = Prothrombin Time; pH = Potential of Hydrogen*. # represents the absolute number.
